# Supplementary material for: Effects of arginine vasopressin on the urine proteome in rats
Source: PeerJ. 2017 May 23;5:e3350. doi: 10.7717/peerj.3350 (PMC5444365; doi:10.7717/peerj.3350)
Supplement: Table S1 [file peerj-05-3350-s001.xlsx]

## Sheet: Sheet 1
Rat 1, 2, 3,controls; rat 4, 5, 6,low-dose group; rat 7, 8, 9,high-dose group.
			Spectral counts
Protein name	Accession Number	Molecular Weight	Rat 1	Rat 2	Rat 3	Rat 4	Rat 5	Rat 6	Rat 7	Rat 8	Rat 9
Peroxiredoxin-2 OS=Rattus norvegicus GN=Prdx2 PE=1 SV=3	PRDX2_RAT	22 kDa	0	0	0	0	0	0	1	0	0
Malate dehydrogenase, mitochondrial OS=Rattus norvegicus GN=Mdh2 PE=1 SV=2	MDHM_RAT	36 kDa	0	0	0	0	0	0	2	2	2
Annexin A4 OS=Rattus norvegicus GN=Anxa4 PE=1 SV=3	ANXA4_RAT	36 kDa	0	0	0	0	0	0	2	1	2
Putative phospholipase B-like 2 OS=Rattus norvegicus GN=Plbd2 PE=1 SV=2	PLBL2_RAT	65 kDa	1	2	1	3	4	4	5	5	4
Growth hormone receptor OS=Rattus norvegicus GN=Ghr PE=1 SV=1	GHR_RAT	71 kDa	0	1	1	2	2	2	1	1	0
Procollagen C-endopeptidase enhancer 1 OS=Rattus norvegicus GN=Pcolce PE=1 SV=1	PCOC1_RAT	50 kDa	1	1	1	2	1	0	0	0	0
Beta-2-microglobulin OS=Rattus norvegicus GN=B2m PE=1 SV=1	B2MG_RAT	14 kDa	3	3	3	4	4	4	3	3	3
Glycosylation-dependent cell adhesion molecule 1 OS=Rattus norvegicus GN=Glycam1 PE=2 SV=1	GLCM1_RAT	15 kDa	2	2	2	2	2	2	2	2	2
Heat shock protein HSP 90-beta OS=Rattus norvegicus GN=Hsp90ab1 PE=1 SV=4	HS90B_RAT	83 kDa	0	0	1	1	0	0	2	2	2
Ceruloplasmin OS=Rattus norvegicus GN=Cp PE=1 SV=3	CERU_RAT	121 kDa	5	6	6	6	5	5	8	7	8
Matrix-remodeling-associated protein 8 OS=Rattus norvegicus GN=Mxra8 PE=2 SV=1	MXRA8_RAT	43 kDa	20	21	21	19	20	18	16	16	17
Sodium/potassium-transporting ATPase subunit beta-1 OS=Rattus norvegicus GN=Atp1b1 PE=1 SV=1	AT1B1_RAT	35 kDa	0	0	0	1	1	0	1	2	2
Prolactin-inducible protein homolog OS=Rattus norvegicus GN=Pip PE=2 SV=1	PIP_RAT	16 kDa	2	3	3	5	6	4	3	4	4
Gamma-glutamyltranspeptidase 1 OS=Rattus norvegicus GN=Ggt1 PE=1 SV=4	GGT1_RAT	62 kDa	15	14	15	11	13	11	10	11	12
Stanniocalcin-1 OS=Rattus norvegicus GN=Stc1 PE=2 SV=1	STC1_RAT	28 kDa	1	1	0	2	1	0	3	3	5
Regenerating islet-derived protein 3-gamma OS=Rattus norvegicus GN=Reg3g PE=1 SV=1	REG3G_RAT	19 kDa	18	16	14	8	13	8	8	8	6
IST1 homolog OS=Rattus norvegicus GN=Ist1 PE=2 SV=1	IST1_RAT	40 kDa	3	5	4	4	4	4	2	2	2
Serine protease inhibitor Kazal-type 7 OS=Rattus norvegicus GN=Spink7 PE=4 SV=1	ISK7_RAT	8 kDa	0	0	0	0	0	1	1	1	1
Pro-cathepsin H OS=Rattus norvegicus GN=Ctsh PE=1 SV=1	CATH_RAT	37 kDa	2	3	3	5	5	5	3	4	3
Apolipoprotein E OS=Rattus norvegicus GN=Apoe PE=1 SV=2	APOE_RAT	36 kDa	13	13	17	12	11	11	10	9	10
Na(+)/H(+) exchange regulatory cofactor NHE-RF1 OS=Rattus norvegicus GN=Slc9a3r1 PE=1 SV=3	NHRF1_RAT	39 kDa	8	7	7	5	6	4	5	6	4
Nucleoside diphosphate kinase A OS=Rattus norvegicus GN=Nme1 PE=1 SV=1	NDKA_RAT	17 kDa	0	0	0	0	0	0	0	0	2
Nucleoside diphosphate kinase B OS=Rattus norvegicus GN=Nme2 PE=1 SV=1	NDKB_RAT	17 kDa	1	0	2	0	0	1	2	3	2
Insulin-like growth factor-binding protein 1 OS=Rattus norvegicus GN=Igfbp1 PE=1 SV=2	IBP1_RAT	30 kDa	0	0	0	0	0	0	2	1	0
Activin receptor type-1B OS=Rattus norvegicus GN=Acvr1b PE=2 SV=1	ACV1B_RAT	57 kDa	0	2	0	3	3	2	2	3	4
Cluster of Major urinary protein OS=Rattus norvegicus PE=1 SV=1 (MUP_RAT)	MUP_RAT [2]	21 kDa	94	87	91	96	103	100	59	80	80
Triosephosphate isomerase OS=Rattus norvegicus GN=Tpi1 PE=1 SV=2	TPIS_RAT	27 kDa	5	4	4	4	4	0	8	6	5
Aflatoxin B1 aldehyde reductase member 3 OS=Rattus norvegicus GN=Akr7a3 PE=1 SV=2	ARK73_RAT	37 kDa	0	0	2	1	0	1	0	1	1
Rab GDP dissociation inhibitor alpha OS=Rattus norvegicus GN=Gdi1 PE=1 SV=1	GDIA_RAT	51 kDa	0	0	0	0	0	0	0	0	1
Glucose-6-phosphate isomerase OS=Rattus norvegicus GN=Gpi PE=1 SV=1	G6PI_RAT	63 kDa	0	1	0	0	0	0	1	1	2
Glyceraldehyde-3-phosphate dehydrogenase OS=Rattus norvegicus GN=Gapdh PE=1 SV=3	G3P_RAT	36 kDa	2	3	1	2	3	4	5	4	4
Junctional adhesion molecule A OS=Rattus norvegicus GN=F11r PE=2 SV=1	JAM1_RAT	32 kDa	8	9	7	5	6	5	6	5	6
Peptidyl-prolyl cis-trans isomerase A OS=Rattus norvegicus GN=Ppia PE=1 SV=2	PPIA_RAT	18 kDa	0	2	3	0	0	2	3	5	4
Alpha-1-acid glycoprotein OS=Rattus norvegicus GN=Orm1 PE=2 SV=1	A1AG_RAT	24 kDa	9	6	8	12	10	9	5	6	6
Apolipoprotein A-I OS=Rattus norvegicus GN=Apoa1 PE=1 SV=2	APOA1_RAT	30 kDa	0	0	0	1	0	0	2	1	3
Cadherin-1 OS=Rattus norvegicus GN=Cdh1 PE=1 SV=1	CADH1_RAT	99 kDa	34	32	36	31	31	28	28	23	28
Insulin-like growth factor-binding protein complex acid labile subunit OS=Rattus norvegicus GN=Igfals PE=1 SV=1	ALS_RAT	67 kDa	0	0	0	0	0	0	2	1	1
Elongation factor 1-alpha 1 OS=Rattus norvegicus GN=Eef1a1 PE=1 SV=1	EF1A1_RAT	50 kDa	2	1	0	0	0	0	2	3	2
Sodium/potassium-transporting ATPase subunit alpha-1 OS=Rattus norvegicus GN=Atp1a1 PE=1 SV=1	AT1A1_RAT	113 kDa	0	0	0	0	0	0	0	1	0
Apolipoprotein A-IV OS=Rattus norvegicus GN=Apoa4 PE=2 SV=2	APOA4_RAT	44 kDa	0	0	0	0	0	0	1	0	2
Urinary protein 3 OS=Rattus norvegicus PE=3 SV=1	UP3_RAT	11 kDa	42	38	44	41	41	39	24	28	37
Fructose-bisphosphate aldolase A OS=Rattus norvegicus GN=Aldoa PE=1 SV=2	ALDOA_RAT	39 kDa	0	0	2	1	1	1	2	2	3
Malate dehydrogenase, cytoplasmic OS=Rattus norvegicus GN=Mdh1 PE=1 SV=3	MDHC_RAT	36 kDa	4	6	5	3	2	2	4	5	4
Cornifin-A OS=Rattus norvegicus GN=Sprr1a PE=2 SV=1	SPR1A_RAT	17 kDa	0	1	0	0	0	0	1	1	1
Cathepsin L1 OS=Rattus norvegicus GN=Ctsl PE=1 SV=2	CATL1_RAT	38 kDa	1	1	0	1	1	1	2	2	1
Myosin light polypeptide 6 OS=Rattus norvegicus GN=Myl6 PE=1 SV=3	MYL6_RAT	17 kDa	0	0	0	0	1	0	1	3	2
PP1RA_RAT-DECOY	PP1RA_RAT-DECOY	?	3	3	4	3	2	3	2	2	2
Haptoglobin OS=Rattus norvegicus GN=Hp PE=1 SV=3	HPT_RAT	39 kDa	6	3	3	10	8	10	1	5	7
Cell surface glycoprotein MUC18 OS=Rattus norvegicus GN=Mcam PE=1 SV=2	MUC18_RAT	71 kDa	0	0	0	0	1	0	1	0	1
Phosphoglycerate kinase 1 OS=Rattus norvegicus GN=Pgk1 PE=1 SV=2	PGK1_RAT	45 kDa	0	0	0	0	0	0	1	3	0
14-3-3 protein epsilon OS=Rattus norvegicus GN=Ywhae PE=1 SV=1	1433E_RAT	29 kDa	1	2	2	0	0	2	4	4	2
Cytoplasmic aconitate hydratase OS=Rattus norvegicus GN=Aco1 PE=1 SV=1	ACOC_RAT	98 kDa	1	0	1	0	0	0	1	1	0
Sialate O-acetylesterase OS=Rattus norvegicus GN=Siae PE=1 SV=2	SIAE_RAT	60 kDa	7	7	5	5	6	7	5	4	4
Cathepsin B OS=Rattus norvegicus GN=Ctsb PE=1 SV=2	CATB_RAT	37 kDa	10	13	10	11	14	13	9	8	8
Neogenin (Fragment) OS=Rattus norvegicus GN=Neo1 PE=2 SV=1	NEO1_RAT	151 kDa	1	2	0	1	0	0	1	1	2
Tubulin alpha-3 chain OS=Rattus norvegicus GN=Tuba3a PE=2 SV=1	TBA3_RAT	50 kDa	0	0	0	0	0	0	1	1	0
Tubulin alpha-1A chain OS=Rattus norvegicus GN=Tuba1a PE=1 SV=1	TBA1A_RAT (+1)	50 kDa	1	0	0	0	0	0	1	2	2
Insulin-like growth factor-binding protein 3 OS=Rattus norvegicus GN=Igfbp3 PE=1 SV=2	IBP3_RAT	32 kDa	2	2	3	1	1	0	0	0	2
Calbindin OS=Rattus norvegicus GN=Calb1 PE=1 SV=2	CALB1_RAT	30 kDa	2	4	0	6	3	2	5	12	14
L-lactate dehydrogenase A chain OS=Rattus norvegicus GN=Ldha PE=1 SV=1	LDHA_RAT	36 kDa	0	0	0	0	0	0	1	0	0
Sodium-dependent neutral amino acid transporter B(0)AT3 OS=Rattus norvegicus GN=Slc6a18 PE=2 SV=1	S6A18_RAT	70 kDa	0	1	1	0	1	0	1	1	0
Major prion protein OS=Rattus norvegicus GN=Prnp PE=1 SV=2	PRIO_RAT	28 kDa	2	2	3	2	0	1	2	1	1
Alkaline phosphatase, tissue-nonspecific isozyme OS=Rattus norvegicus GN=Alpl PE=1 SV=2	PPBT_RAT	58 kDa	0	2	1	2	2	0	5	4	2
Ribonuclease UK114 OS=Rattus norvegicus GN=Hrsp12 PE=1 SV=3	UK114_RAT	14 kDa	1	0	0	0	0	1	2	2	2
Cubilin OS=Rattus norvegicus GN=Cubn PE=1 SV=2	CUBN_RAT	399 kDa	7	5	7	6	4	3	9	10	7
Complement factor D OS=Rattus norvegicus GN=Cfd PE=1 SV=2	CFAD_RAT	28 kDa	25	19	18	16	18	18	14	14	13
Neural cell adhesion molecule L1 OS=Rattus norvegicus GN=L1cam PE=2 SV=3	L1CAM_RAT	141 kDa	3	2	2	2	2	3	3	3	4
Na(+)/H(+) exchange regulatory cofactor NHE-RF3 OS=Rattus norvegicus GN=Pdzk1 PE=1 SV=2	NHRF3_RAT	57 kDa	7	6	11	8	8	5	12	14	12
Programmed cell death 6-interacting protein OS=Rattus norvegicus GN=Pdcd6ip PE=1 SV=2	PDC6I_RAT	97 kDa	2	2	2	2	2	1	4	3	3
ATP synthase subunit beta, mitochondrial OS=Rattus norvegicus GN=Atp5b PE=1 SV=2	ATPB_RAT	56 kDa	0	0	0	0	0	0	1	4	0
Complement component C9 OS=Rattus norvegicus GN=C9 PE=2 SV=1	CO9_RAT	62 kDa	1	2	2	3	3	4	4	3	2
Lithostathine OS=Rattus norvegicus GN=Reg1 PE=1 SV=1	LITH_RAT	19 kDa	3	1	3	5	4	3	2	2	0
Phosphoglycerate mutase 1 OS=Rattus norvegicus GN=Pgam1 PE=1 SV=4	PGAM1_RAT	29 kDa	2	2	2	0	0	0	2	3	2
Urokinase-type plasminogen activator OS=Rattus norvegicus GN=Plau PE=1 SV=1	UROK_RAT	48 kDa	12	11	12	13	13	13	14	12	14
Alpha-enolase OS=Rattus norvegicus GN=Eno1 PE=1 SV=4	ENOA_RAT	47 kDa	7	7	6	6	5	8	9	9	9
Podocalyxin OS=Rattus norvegicus GN=Podxl PE=1 SV=2	PODXL_RAT	52 kDa	3	4	3	2	2	2	3	3	4
C-reactive protein OS=Rattus norvegicus GN=Crp PE=1 SV=1	CRP_RAT	25 kDa	3	2	3	3	3	2	4	3	5
Ig kappa chain V region S211 OS=Rattus norvegicus PE=1 SV=1	KVX01_RAT	12 kDa	3	2	3	6	2	6	2	2	2
N(4)-(Beta-N-acetylglucosaminyl)-L-asparaginase OS=Rattus norvegicus GN=Aga PE=1 SV=2	ASPG_RAT	37 kDa	0	2	2	0	0	0	0	0	0
CD166 antigen OS=Rattus norvegicus GN=Alcam PE=1 SV=1	CD166_RAT	65 kDa	3	3	2	4	4	2	6	4	4
Ribonuclease 4 OS=Rattus norvegicus GN=Rnase4 PE=1 SV=1	RNAS4_RAT	17 kDa	3	2	2	2	4	4	2	1	1
Glutamate--cysteine ligase catalytic subunit OS=Rattus norvegicus GN=Gclc PE=1 SV=2	GSH1_RAT	73 kDa	11	11	8	4	8	6	8	9	8
Fatty acid-binding protein, heart OS=Rattus norvegicus GN=Fabp3 PE=1 SV=2	FABPH_RAT	15 kDa	0	0	1	0	0	0	2	1	0
Di-N-acetylchitobiase OS=Rattus norvegicus GN=Ctbs PE=1 SV=1	DIAC_RAT	42 kDa	9	8	8	8	7	4	6	6	6
Neutrophil gelatinase-associated lipocalin OS=Rattus norvegicus GN=Lcn2 PE=1 SV=2	NGAL_RAT	22 kDa	2	3	3	5	3	4	3	3	3
Macrophage migration inhibitory factor OS=Rattus norvegicus GN=Mif PE=1 SV=4	MIF_RAT	12 kDa	0	0	0	0	0	0	1	1	0
Purine nucleoside phosphorylase OS=Rattus norvegicus GN=Pnp PE=1 SV=1	PNPH_RAT	32 kDa	0	0	0	0	0	0	1	0	1
Osteopontin OS=Rattus norvegicus GN=Spp1 PE=1 SV=2	OSTP_RAT	35 kDa	0	0	4	10	8	1	7	9	8
Amyloid-like protein 2 OS=Rattus norvegicus GN=Aplp2 PE=2 SV=2	APLP2_RAT	87 kDa	0	0	0	0	2	0	2	1	2
Parvalbumin alpha OS=Rattus norvegicus GN=Pvalb PE=1 SV=2	PRVA_RAT	12 kDa	5	3	1	5	5	4	5	7	5
Glutathione S-transferase alpha-1 OS=Rattus norvegicus GN=Gsta1 PE=1 SV=3	GSTA1_RAT	26 kDa	3	3	3	1	3	1	3	4	3
Glutathione S-transferase alpha-3 OS=Rattus norvegicus GN=Gsta3 PE=1 SV=3	GSTA3_RAT	25 kDa	0	2	0	0	1	0	0	2	0
Glutamate--cysteine ligase regulatory subunit OS=Rattus norvegicus GN=Gclm PE=1 SV=1	GSH0_RAT	31 kDa	3	3	0	1	0	0	2	1	0
Ig gamma-1 chain C region OS=Rattus norvegicus PE=1 SV=1	IGHG1_RAT	36 kDa	0	0	0	2	2	2	2	1	3
Fructose-bisphosphate aldolase B OS=Rattus norvegicus GN=Aldob PE=1 SV=2	ALDOB_RAT	40 kDa	2	3	3	2	3	4	4	3	3
Renin receptor OS=Rattus norvegicus GN=Atp6ap2 PE=2 SV=1	RENR_RAT	39 kDa	0	0	0	0	0	0	0	1	0
Fibulin-5 OS=Rattus norvegicus GN=Fbln5 PE=2 SV=1	FBLN5_RAT	50 kDa	0	0	0	0	0	0	1	0	0
Protein DJ-1 OS=Rattus norvegicus GN=Park7 PE=1 SV=1	PARK7_RAT	20 kDa	0	0	0	1	0	0	0	3	0
Glutathione S-transferase P OS=Rattus norvegicus GN=Gstp1 PE=1 SV=2	GSTP1_RAT	23 kDa	3	3	3	3	2	2	2	3	3
Gelsolin OS=Rattus norvegicus GN=Gsn PE=1 SV=1	GELS_RAT	86 kDa	25	25	23	22	24	18	16	18	22
N-acyl-aromatic-L-amino acid amidohydrolase (carboxylate-forming) OS=Rattus norvegicus GN=Acy3 PE=2 SV=1	ACY3_RAT	35 kDa	2	2	0	1	1	0	2	3	0
Copper transport protein ATOX1 OS=Rattus norvegicus GN=Atox1 PE=1 SV=1	ATOX1_RAT	7 kDa	6	4	5	6	6	5	7	7	9
Histone H2B type 1 OS=Rattus norvegicus PE=1 SV=2	H2B1_RAT	14 kDa	0	0	0	0	0	0	1	0	1
Pro-epidermal growth factor OS=Rattus norvegicus GN=Egf PE=1 SV=2	EGF_RAT	124 kDa	77	77	72	75	66	70	62	64	72
BMP and activin membrane-bound inhibitor homolog OS=Rattus norvegicus GN=Bambi PE=2 SV=1	BAMBI_RAT	29 kDa	1	1	0	0	2	1	0	1	1
Dihydrolipoyllysine-residue succinyltransferase component of 2-oxoglutarate dehydrogenase complex, mitochondrial OS=Rattus norvegicus GN=Dlst PE=1 SV=2	ODO2_RAT	49 kDa	1	1	0	2	1	0	2	1	2
Lysosomal thioesterase PPT2 OS=Rattus norvegicus GN=Ppt2 PE=2 SV=1	PPT2_RAT	34 kDa	1	0	2	2	1	1	2	3	3
Prostasin OS=Rattus norvegicus GN=Prss8 PE=2 SV=3	PRSS8_RAT	37 kDa	0	0	1	0	0	0	0	0	0
Xaa-Pro aminopeptidase 1 OS=Rattus norvegicus GN=Xpnpep1 PE=1 SV=1	XPP1_RAT	70 kDa	0	0	0	0	0	0	0	1	0
Beta-hexosaminidase subunit alpha OS=Rattus norvegicus GN=Hexa PE=2 SV=1	HEXA_RAT	61 kDa	3	3	3	2	0	4	5	4	3
Nidogen-1 (Fragment) OS=Rattus norvegicus GN=Nid1 PE=1 SV=2	NID1_RAT	36 kDa	5	6	4	6	6	6	4	5	5
Attractin OS=Rattus norvegicus GN=Atrn PE=2 SV=1	ATRN_RAT	159 kDa	5	7	4	2	4	3	4	3	4
Ig kappa chain C region, B allele OS=Rattus norvegicus PE=1 SV=1	KACB_RAT	12 kDa	48	60	66	60	62	53	49	46	48
Biotinidase OS=Rattus norvegicus GN=Btd PE=2 SV=1	BTD_RAT	58 kDa	8	9	7	6	6	5	8	6	5
Acyl-CoA-binding protein OS=Rattus norvegicus GN=Dbi PE=1 SV=3	ACBP_RAT	10 kDa	0	0	0	0	0	1	2	2	0
Secreted phosphoprotein 24 OS=Rattus norvegicus GN=Spp2 PE=2 SV=2	SPP24_RAT	23 kDa	3	3	2	2	2	1	2	3	1
Deoxyribonuclease-1 OS=Rattus norvegicus GN=Dnase1 PE=2 SV=1	DNAS1_RAT	32 kDa	11	12	12	14	14	12	12	11	12
Moesin OS=Rattus norvegicus GN=Msn PE=1 SV=3	MOES_RAT	68 kDa	12	12	10	7	8	10	9	10	12
Complement C3 OS=Rattus norvegicus GN=C3 PE=1 SV=3	CO3_RAT	186 kDa	9	8	7	9	13	7	10	17	14
Protein AMBP OS=Rattus norvegicus GN=Ambp PE=1 SV=1	AMBP_RAT	39 kDa	35	31	33	27	27	34	30	22	26
Annexin A2 OS=Rattus norvegicus GN=Anxa2 PE=1 SV=2	ANXA2_RAT	39 kDa	0	0	0	0	0	0	0	1	0
Protein RoBo-1 OS=Rattus norvegicus PE=1 SV=1	ROB1_RAT	26 kDa	3	4	3	2	4	3	2	2	1
Vascular cell adhesion protein 1 OS=Rattus norvegicus GN=Vcam1 PE=2 SV=1	VCAM1_RAT	81 kDa	5	3	5	5	6	5	4	4	2
Ketohexokinase OS=Rattus norvegicus GN=Khk PE=1 SV=1	KHK_RAT	33 kDa	0	0	0	0	0	1	1	1	1
L-lactate dehydrogenase B chain OS=Rattus norvegicus GN=Ldhb PE=1 SV=2	LDHB_RAT	37 kDa	4	6	6	4	5	5	8	10	5
Chloride intracellular channel protein 4 OS=Rattus norvegicus GN=Clic4 PE=1 SV=3	CLIC4_RAT	29 kDa	0	2	1	0	0	0	0	1	0
Atrial natriuretic peptide-converting enzyme OS=Rattus norvegicus GN=Corin PE=1 SV=2	CORIN_RAT	123 kDa	0	0	0	0	0	0	0	0	1
Alpha-N-acetylgalactosaminidase OS=Rattus norvegicus GN=Naga PE=2 SV=1	NAGAB_RAT	47 kDa	3	2	3	3	2	4	5	6	3
Cytosolic non-specific dipeptidase OS=Rattus norvegicus GN=Cndp2 PE=1 SV=1	CNDP2_RAT	53 kDa	1	3	1	0	0	1	1	0	1
Fetuin-B OS=Rattus norvegicus GN=Fetub PE=2 SV=2	FETUB_RAT	42 kDa	8	9	10	10	11	9	12	10	10
Plasminogen OS=Rattus norvegicus GN=Plg PE=2 SV=2	PLMN_RAT	91 kDa	37	34	35	44	42	33	34	35	31
Cadherin-2 OS=Rattus norvegicus GN=Cdh2 PE=1 SV=1	CADH2_RAT	100 kDa	2	4	2	2	1	2	2	2	2
CD44 antigen OS=Rattus norvegicus GN=Cd44 PE=1 SV=2	CD44_RAT	56 kDa	2	3	2	2	2	0	3	2	3
Sulfated glycoprotein 1 OS=Rattus norvegicus GN=Psap PE=1 SV=1	SAP_RAT	61 kDa	9	11	11	12	14	11	12	12	10
Extracellular superoxide dismutase [Cu-Zn] OS=Rattus norvegicus GN=Sod3 PE=1 SV=2	SODE_RAT	27 kDa	6	5	5	5	6	6	4	5	5
Beta-2-glycoprotein 1 OS=Rattus norvegicus GN=Apoh PE=2 SV=2	APOH_RAT	33 kDa	3	4	3	6	4	3	5	5	7
Aflatoxin B1 aldehyde reductase member 2 OS=Rattus norvegicus GN=Akr7a2 PE=1 SV=2	ARK72_RAT	41 kDa	0	0	0	0	0	0	0	1	0
Cathepsin D OS=Rattus norvegicus GN=Ctsd PE=1 SV=1	CATD_RAT	45 kDa	5	6	6	9	6	8	8	5	6
Putative lysozyme C-2 OS=Rattus norvegicus GN=Lyz2 PE=5 SV=1	LYSC2_RAT	17 kDa	2	2	0	1	2	1	1	1	0
Annexin A1 OS=Rattus norvegicus GN=Anxa1 PE=1 SV=2	ANXA1_RAT	39 kDa	0	4	0	0	1	1	5	3	3
Reticulon-4 receptor-like 2 OS=Rattus norvegicus GN=Rtn4rl2 PE=1 SV=1	R4RL2_RAT	46 kDa	0	0	0	0	0	0	1	2	1
Chloride intracellular channel protein 1 OS=Rattus norvegicus GN=Clic1 PE=1 SV=1	CLIC1_RAT	27 kDa	2	3	3	0	2	1	1	3	2
Cystatin-C OS=Rattus norvegicus GN=Cst3 PE=1 SV=2	CYTC_RAT	15 kDa	9	9	7	9	5	6	6	6	4
Neural cell adhesion molecule 1 OS=Rattus norvegicus GN=Ncam1 PE=1 SV=1	NCAM1_RAT	95 kDa	0	2	1	2	0	2	2	2	2
Low-density lipoprotein receptor-related protein 2 OS=Rattus norvegicus GN=Lrp2 PE=1 SV=1	LRP2_RAT	519 kDa	80	80	82	75	83	74	80	83	84
Lambda-crystallin homolog OS=Rattus norvegicus GN=Cryl1 PE=2 SV=3	CRYL1_RAT	35 kDa	0	0	0	0	0	0	0	1	0
Aggrecan core protein OS=Rattus norvegicus GN=Acan PE=1 SV=2	PGCA_RAT	221 kDa	3	3	3	2	2	2	3	2	3
Peroxiredoxin-1 OS=Rattus norvegicus GN=Prdx1 PE=1 SV=1	PRDX1_RAT	22 kDa	2	1	0	0	0	0	1	2	3
Leucine-rich repeat-containing protein 15 OS=Rattus norvegicus GN=Lrrc15 PE=2 SV=1	LRC15_RAT	64 kDa	0	1	0	0	0	0	1	0	0
Class I histocompatibility antigen, Non-RT1.A alpha-1 chain OS=Rattus norvegicus GN=RT1-Aw2 PE=1 SV=1	HA11_RAT	37 kDa	8	3	7	6	2	2	3	3	4
Histidine triad nucleotide-binding protein 1 OS=Rattus norvegicus GN=Hint1 PE=1 SV=5	HINT1_RAT	14 kDa	0	1	0	0	0	0	1	1	0
Glypican-3 OS=Rattus norvegicus GN=Gpc3 PE=1 SV=1	GPC3_RAT	67 kDa	0	1	1	1	2	2	2	1	3
Aldose 1-epimerase OS=Rattus norvegicus GN=Galm PE=1 SV=1	GALM_RAT	38 kDa	0	1	0	0	0	0	1	1	0
Fibrinogen beta chain OS=Rattus norvegicus GN=Fgb PE=1 SV=4	FIBB_RAT	54 kDa	0	0	0	0	0	0	0	5	0
Collectin-12 OS=Rattus norvegicus GN=Colec12 PE=2 SV=1	COL12_RAT	82 kDa	4	3	3	3	4	2	2	1	3
Submandibular glandular kallikrein-9 OS=Rattus norvegicus GN=Klk9 PE=1 SV=1	KLK9_RAT	28 kDa	15	13	16	14	10	16	11	12	12
Acid ceramidase OS=Rattus norvegicus GN=Asah1 PE=2 SV=1	ASAH1_RAT	44 kDa	1	3	0	3	2	2	1	0	0
Phospholipase D3 OS=Rattus norvegicus GN=Pld3 PE=2 SV=1	PLD3_RAT	54 kDa	0	2	0	1	0	0	2	0	1
Alcohol dehydrogenase [NADP(+)] OS=Rattus norvegicus GN=Akr1a1 PE=1 SV=2	AK1A1_RAT	37 kDa	4	3	4	2	0	2	2	6	3
Isopentenyl-diphosphate Delta-isomerase 1 OS=Rattus norvegicus GN=Idi1 PE=2 SV=2	IDI1_RAT	26 kDa	0	0	0	0	0	0	1	0	0
Angiopoietin-related protein 4 OS=Rattus norvegicus GN=Angptl4 PE=1 SV=1	ANGL4_RAT	45 kDa	0	0	0	1	0	0	0	1	0
Trefoil factor 1 OS=Rattus norvegicus GN=Tff1 PE=3 SV=1	TFF1_RAT	9 kDa	5	4	6	4	5	4	4	3	4
Complement factor I OS=Rattus norvegicus GN=Cfi PE=2 SV=1	CFAI_RAT	67 kDa	1	0	0	0	0	0	0	1	2
Sodium/glucose cotransporter 2 OS=Rattus norvegicus GN=Slc5a2 PE=2 SV=1	SC5A2_RAT	73 kDa	0	0	1	0	0	0	1	0	0
Ig lambda-2 chain C region OS=Rattus norvegicus PE=4 SV=1	LAC2_RAT	11 kDa	14	16	19	19	18	17	15	14	16
Aminoacylase-1A OS=Rattus norvegicus GN=Acy1a PE=1 SV=1	ACY1A_RAT	46 kDa	7	7	6	2	7	3	5	6	4
V-type proton ATPase subunit S1 OS=Rattus norvegicus GN=Atp6ap1 PE=2 SV=1	VAS1_RAT	51 kDa	1	0	0	0	1	2	2	1	1
Choline transporter-like protein 4 OS=Rattus norvegicus GN=Slc44a4 PE=2 SV=1	CTL4_RAT	79 kDa	0	1	1	0	0	0	1	2	0
CD48 antigen OS=Rattus norvegicus GN=Cd48 PE=1 SV=1	CD48_RAT	28 kDa	3	2	3	3	6	5	4	4	6
Neutrophil collagenase OS=Rattus norvegicus GN=Mmp8 PE=2 SV=1	MMP8_RAT	53 kDa	2	2	2	3	3	1	0	1	2
Selenium-binding protein 1 OS=Rattus norvegicus GN=Selenbp1 PE=1 SV=1	SBP1_RAT	53 kDa	0	0	1	0	0	0	1	2	0
Macrophage colony-stimulating factor 1 OS=Rattus norvegicus GN=Csf1 PE=2 SV=1	CSF1_RAT	62 kDa	1	2	1	3	1	3	2	3	0
Regucalcin OS=Rattus norvegicus GN=Rgn PE=1 SV=3	RGN_RAT	33 kDa	0	2	0	0	1	0	1	2	0
Profilin-1 OS=Rattus norvegicus GN=Pfn1 PE=1 SV=2	PROF1_RAT	15 kDa	1	2	0	0	0	0	2	1	0
Dipeptidyl peptidase 2 OS=Rattus norvegicus GN=Dpp7 PE=1 SV=1	DPP2_RAT	55 kDa	13	14	12	9	13	13	11	10	10
Lysosomal alpha-glucosidase OS=Rattus norvegicus GN=Gaa PE=2 SV=1	LYAG_RAT	106 kDa	10	8	8	12	15	9	9	10	13
Prostatic glandular kallikrein-6 OS=Rattus norvegicus GN=Klk6 PE=3 SV=1	KLK6_RAT	29 kDa	9	8	7	11	4	12	5	5	6
Tyrosine-protein kinase Mer OS=Rattus norvegicus GN=Mertk PE=2 SV=1	MERTK_RAT	109 kDa	0	0	0	0	0	0	1	0	0
Multiple inositol polyphosphate phosphatase 1 OS=Rattus norvegicus GN=Minpp1 PE=1 SV=3	MINP1_RAT	55 kDa	3	4	4	8	5	5	7	6	5
Prostaglandin-H2 D-isomerase OS=Rattus norvegicus GN=Ptgds PE=1 SV=2	PTGDS_RAT	21 kDa	5	6	5	5	7	6	5	5	5
Apolipoprotein C-I OS=Rattus norvegicus GN=Apoc1 PE=2 SV=1	APOC1_RAT	10 kDa	0	0	1	2	0	1	1	2	2
T-kininogen 1 OS=Rattus norvegicus GN=Map1 PE=1 SV=2	KNT1_RAT	48 kDa	12	13	19	19	13	16	10	14	10
T-kininogen 2 OS=Rattus norvegicus PE=1 SV=2	KNT2_RAT	48 kDa	12	11	14	18	11	13	9	13	8
CD59 glycoprotein OS=Rattus norvegicus GN=Cd59 PE=1 SV=2	CD59_RAT	14 kDa	5	3	5	4	3	5	3	3	3
Fractalkine OS=Rattus norvegicus GN=Cx3cl1 PE=2 SV=3	X3CL1_RAT	42 kDa	1	2	3	2	1	1	2	2	2
Ezrin OS=Rattus norvegicus GN=Ezr PE=1 SV=3	EZRI_RAT	69 kDa	10	11	10	8	7	10	9	11	13
Lysosomal acid phosphatase OS=Rattus norvegicus GN=Acp2 PE=1 SV=1	PPAL_RAT	48 kDa	8	7	5	7	5	7	4	6	5
4-trimethylaminobutyraldehyde dehydrogenase OS=Rattus norvegicus GN=Aldh9a1 PE=1 SV=1	AL9A1_RAT	54 kDa	0	0	0	0	0	0	0	1	0
Beta-mannosidase OS=Rattus norvegicus GN=Manba PE=2 SV=1	MANBA_RAT	101 kDa	5	4	5	5	8	7	8	7	4
Glutathione synthetase OS=Rattus norvegicus GN=Gss PE=1 SV=1	GSHB_RAT	52 kDa	2	4	2	0	3	2	4	4	3
Collectrin OS=Rattus norvegicus GN=Tmem27 PE=1 SV=2	TMM27_RAT	25 kDa	0	1	0	1	2	1	0	0	0
Cystathionine gamma-lyase OS=Rattus norvegicus GN=Cth PE=1 SV=2	CGL_RAT	44 kDa	0	1	1	0	1	0	0	1	1
Platelet-derived growth factor receptor alpha OS=Rattus norvegicus GN=Pdgfra PE=1 SV=2	PGFRA_RAT	123 kDa	2	0	0	0	2	1	1	2	2
Synaptic vesicle membrane protein VAT-1 homolog OS=Rattus norvegicus GN=Vat1 PE=1 SV=1	VAT1_RAT	43 kDa	1	0	0	0	0	0	1	2	0
Sulfotransferase 1C2A OS=Rattus norvegicus GN=Sult1c2a PE=2 SV=2	S1C2A_RAT	35 kDa	3	1	0	0	1	0	0	1	1
Thioredoxin OS=Rattus norvegicus GN=Txn PE=1 SV=2	THIO_RAT	12 kDa	3	3	3	2	2	4	3	2	2
CD320 antigen OS=Rattus norvegicus GN=Cd320 PE=2 SV=1	CD320_RAT	28 kDa	1	0	1	0	1	1	1	1	0
Actin, cytoplasmic 1 OS=Rattus norvegicus GN=Actb PE=1 SV=1	ACTB_RAT (+1)	42 kDa	18	16	16	14	16	15	18	15	15
Actin, aortic smooth muscle OS=Rattus norvegicus GN=Acta2 PE=2 SV=1	ACTA_RAT	42 kDa	9	8	7	7	8	6	8	7	7
Glutathione S-transferase omega-1 OS=Rattus norvegicus GN=Gsto1 PE=1 SV=2	GSTO1_RAT	28 kDa	0	0	0	0	0	0	0	1	0
Argininosuccinate synthase OS=Rattus norvegicus GN=Ass1 PE=2 SV=1	ASSY_RAT	46 kDa	0	0	0	0	0	0	0	2	0
Carboxylesterase 1C OS=Rattus norvegicus GN=Ces1c PE=1 SV=3	EST1C_RAT	60 kDa	8	10	11	11	11	8	12	10	12
1,2-dihydroxy-3-keto-5-methylthiopentene dioxygenase OS=Rattus norvegicus GN=Adi1 PE=2 SV=1	MTND_RAT	21 kDa	0	0	0	0	1	1	0	0	1
Protein S100-A6 OS=Rattus norvegicus GN=S100a6 PE=1 SV=3	S10A6_RAT	10 kDa	0	1	0	0	0	0	0	0	0
EH domain-containing protein 1 OS=Rattus norvegicus GN=Ehd1 PE=1 SV=1	EHD1_RAT	61 kDa	0	0	0	0	0	0	1	1	0
Hemopexin OS=Rattus norvegicus GN=Hpx PE=1 SV=3	HEMO_RAT	51 kDa	45	42	46	48	50	40	38	42	44
Chondroitin sulfate proteoglycan 4 OS=Rattus norvegicus GN=Cspg4 PE=1 SV=2	CSPG4_RAT	252 kDa	7	6	5	3	7	3	5	3	5
Coagulation factor X OS=Rattus norvegicus GN=F10 PE=2 SV=1	FA10_RAT	54 kDa	1	1	1	0	1	2	2	1	2
Latrophilin-1 OS=Rattus norvegicus GN=Lphn1 PE=1 SV=1	LPHN1_RAT	167 kDa	0	1	1	0	1	1	1	1	1
Murinoglobulin-2 OS=Rattus norvegicus GN=Mug2 PE=1 SV=1	MUG2_RAT	162 kDa	20	21	25	19	19	11	18	19	20
Murinoglobulin-1 OS=Rattus norvegicus GN=Mug1 PE=2 SV=1	MUG1_RAT	165 kDa	26	28	29	23	25	12	21	21	27
Alpha-1-inhibitor 3 OS=Rattus norvegicus GN=A1i3 PE=1 SV=1	A1I3_RAT	164 kDa	32	33	37	30	34	19	28	28	35
Alpha-lactalbumin OS=Rattus norvegicus GN=Lalba PE=1 SV=1	LALBA_RAT	18 kDa	3	3	3	3	4	5	3	4	3
Anthrax toxin receptor 1 OS=Rattus norvegicus GN=Antxr1 PE=2 SV=2	ANTR1_RAT	62 kDa	3	3	2	3	2	2	2	2	2
Serotransferrin OS=Rattus norvegicus GN=Tf PE=1 SV=3	TRFE_RAT	76 kDa	38	36	37	37	44	47	42	38	55
Angiotensinogen OS=Rattus norvegicus GN=Agt PE=1 SV=1	ANGT_RAT	52 kDa	4	6	4	5	9	8	7	6	3
Inter-alpha-trypsin inhibitor heavy chain H3 OS=Rattus norvegicus GN=Itih3 PE=2 SV=1	ITIH3_RAT	99 kDa	1	1	1	2	2	1	1	2	0
Beta-hexosaminidase subunit beta OS=Rattus norvegicus GN=Hexb PE=2 SV=1	HEXB_RAT	62 kDa	3	3	4	2	3	5	6	4	4
NKG2-D type II integral membrane protein OS=Rattus norvegicus GN=Klrk1 PE=2 SV=1	NKG2D_RAT	24 kDa	0	0	0	0	0	1	0	0	0
Complement component C6 OS=Rattus norvegicus GN=C6 PE=2 SV=1	CO6_RAT	105 kDa	0	0	0	1	0	0	1	0	1
Afamin OS=Rattus norvegicus GN=Afm PE=3 SV=1	AFAM_RAT	69 kDa	20	25	23	24	23	17	20	13	21
Neutral and basic amino acid transport protein rBAT OS=Rattus norvegicus GN=Slc3a1 PE=1 SV=1	SLC31_RAT	79 kDa	18	22	18	16	21	14	20	21	21
Tripeptidyl-peptidase 1 OS=Rattus norvegicus GN=Tpp1 PE=1 SV=1	TPP1_RAT	61 kDa	1	2	2	4	2	1	3	4	3
Biglycan OS=Rattus norvegicus GN=Bgn PE=2 SV=1	PGS1_RAT	42 kDa	3	3	5	4	0	2	3	3	3
Tumor necrosis factor receptor superfamily member 1B OS=Rattus norvegicus GN=Tnfrsf1b PE=2 SV=1	TNR1B_RAT	50 kDa	0	0	0	0	1	0	0	0	0
Growth arrest-specific protein 6 OS=Rattus norvegicus GN=Gas6 PE=1 SV=1	GAS6_RAT	75 kDa	2	2	5	1	3	1	5	3	3
Fibrinogen gamma chain OS=Rattus norvegicus GN=Fgg PE=1 SV=3	FIBG_RAT	51 kDa	0	0	0	0	0	0	0	3	0
Frizzled-4 OS=Rattus norvegicus GN=Fzd4 PE=2 SV=1	FZD4_RAT	60 kDa	2	3	2	3	2	1	1	2	2
Alpha-1-macroglobulin OS=Rattus norvegicus GN=A1m PE=1 SV=1	A1M_RAT	167 kDa	62	66	64	66	63	66	63	61	64
Meprin A subunit beta OS=Rattus norvegicus GN=Mep1b PE=1 SV=3	MEP1B_RAT	79 kDa	20	16	19	18	15	14	15	16	19
Transmembrane protein 132A OS=Rattus norvegicus GN=Tmem132a PE=1 SV=1	T132A_RAT	111 kDa	0	2	2	0	2	2	2	2	3
Granulins OS=Rattus norvegicus GN=Grn PE=1 SV=3	GRN_RAT	63 kDa	10	12	13	13	13	13	13	11	12
Pancreatic alpha-amylase OS=Rattus norvegicus GN=Amy2 PE=2 SV=2	AMYP_RAT	57 kDa	12	13	11	8	12	15	9	10	10
Peroxiredoxin-6 OS=Rattus norvegicus GN=Prdx6 PE=1 SV=3	PRDX6_RAT	25 kDa	4	4	3	2	5	3	4	6	4
ACHA6_RAT-DECOY	ACHA6_RAT-DECOY	?	6	4	7	5	6	4	4	3	6
Superoxide dismutase [Cu-Zn] OS=Rattus norvegicus GN=Sod1 PE=1 SV=2	SODC_RAT	16 kDa	8	7	8	8	8	6	8	6	6
Trefoil factor 3 OS=Rattus norvegicus GN=Tff3 PE=1 SV=1	TFF3_RAT	9 kDa	3	2	4	3	4	6	4	3	4
Dipeptidyl peptidase 1 OS=Rattus norvegicus GN=Ctsc PE=1 SV=3	CATC_RAT	52 kDa	4	5	8	5	5	4	5	8	6
Ig gamma-2C chain C region OS=Rattus norvegicus PE=2 SV=1	IGG2C_RAT	37 kDa	0	0	0	0	2	0	2	2	0
Protein NOV homolog OS=Rattus norvegicus GN=Nov PE=1 SV=1	NOV_RAT	39 kDa	5	4	3	2	3	5	3	2	2
Thy-1 membrane glycoprotein OS=Rattus norvegicus GN=Thy1 PE=1 SV=1	THY1_RAT	18 kDa	2	1	0	2	1	1	1	0	0
Alpha-actinin-4 OS=Rattus norvegicus GN=Actn4 PE=1 SV=2	ACTN4_RAT	105 kDa	0	0	0	0	0	0	0	0	1
Killer cell lectin-like receptor subfamily G member 1 OS=Rattus norvegicus GN=Klrg1 PE=1 SV=1	KLRG1_RAT	21 kDa	0	0	0	0	0	2	0	0	0
Leukemia inhibitory factor receptor OS=Rattus norvegicus GN=Lifr PE=2 SV=1	LIFR_RAT	122 kDa	0	0	0	0	2	1	2	0	0
Galectin-5 OS=Rattus norvegicus GN=Lgals5 PE=1 SV=2	LEG5_RAT	16 kDa	2	3	4	3	0	3	4	4	4
14-3-3 protein gamma OS=Rattus norvegicus GN=Ywhag PE=1 SV=2	1433G_RAT	28 kDa	0	0	1	0	2	0	2	2	3
14-3-3 protein zeta/delta OS=Rattus norvegicus GN=Ywhaz PE=1 SV=1	1433Z_RAT	28 kDa	4	7	4	4	5	4	5	5	4
14-3-3 protein theta OS=Rattus norvegicus GN=Ywhaq PE=1 SV=1	1433T_RAT	28 kDa	0	0	0	0	0	0	0	1	0
Keratin, type I cytoskeletal 18 OS=Rattus norvegicus GN=Krt18 PE=1 SV=3	K1C18_RAT	48 kDa	0	1	1	1	1	1	4	5	3
Keratin, type I cytoskeletal 42 OS=Rattus norvegicus GN=Krt42 PE=3 SV=1	K1C42_RAT	50 kDa	0	0	3	0	0	0	0	0	0
Keratin, type I cytoskeletal 10 OS=Rattus norvegicus GN=Krt10 PE=3 SV=1	K1C10_RAT	57 kDa	6	2	5	3	6	6	4	2	7
Gamma-interferon-inducible lysosomal thiol reductase OS=Rattus norvegicus GN=Ifi30 PE=2 SV=1	GILT_RAT	28 kDa	5	7	4	7	8	5	6	7	6
Sodium/glucose cotransporter 1 OS=Rattus norvegicus GN=Slc5a1 PE=2 SV=1	SC5A1_RAT	73 kDa	0	0	1	0	0	0	1	1	0
Aldehyde oxidase 4 OS=Rattus norvegicus GN=Aox4 PE=2 SV=1	AOXD_RAT	148 kDa	0	0	0	0	0	0	3	0	0
Hemoglobin subunit beta-1 OS=Rattus norvegicus GN=Hbb PE=1 SV=3	HBB1_RAT	16 kDa	0	0	0	0	0	0	0	1	0
Deoxyribonuclease-2-beta OS=Rattus norvegicus GN=Dnase2b PE=1 SV=1	DNS2B_RAT	40 kDa	0	0	0	0	0	3	0	0	0
Cystatin-A OS=Rattus norvegicus GN=Csta PE=1 SV=1	CYTA_RAT	12 kDa	0	0	0	0	0	0	1	0	0
Tissue alpha-L-fucosidase OS=Rattus norvegicus GN=Fuca1 PE=1 SV=1	FUCO_RAT	53 kDa	3	4	3	3	6	5	4	5	3
Odorant-binding protein OS=Rattus norvegicus GN=Obp1f PE=1 SV=1	OBP_RAT	20 kDa	3	6	6	5	4	5	5	3	3
Calmodulin OS=Rattus norvegicus GN=Calm1 PE=1 SV=2	CALM_RAT	17 kDa	4	5	5	3	4	5	4	5	4
Sortilin OS=Rattus norvegicus GN=Sort1 PE=1 SV=3	SORT_RAT	91 kDa	2	2	2	2	3	2	3	2	4
Retinoid-inducible serine carboxypeptidase OS=Rattus norvegicus GN=Scpep1 PE=2 SV=1	RISC_RAT	51 kDa	8	6	7	10	6	7	8	10	8
Corticosteroid-binding globulin OS=Rattus norvegicus GN=Serpina6 PE=1 SV=2	CBG_RAT	45 kDa	6	6	8	7	7	5	6	6	4
Cadherin-related family member 5 OS=Rattus norvegicus GN=Cdhr5 PE=1 SV=1	CDHR5_RAT	91 kDa	5	5	4	4	4	4	5	4	5
Alpha-2-HS-glycoprotein OS=Rattus norvegicus GN=Ahsg PE=1 SV=2	FETUA_RAT	38 kDa	21	18	18	22	19	19	19	17	19
Serum amyloid P-component OS=Rattus norvegicus GN=Apcs PE=2 SV=2	SAMP_RAT	26 kDa	9	11	10	7	8	13	9	5	9
Carbonic anhydrase 1 OS=Rattus norvegicus GN=Ca1 PE=1 SV=1	CAH1_RAT	28 kDa	0	1	0	0	0	0	0	0	0
Lipoprotein lipase OS=Rattus norvegicus GN=Lpl PE=1 SV=1	LIPL_RAT	53 kDa	0	0	0	0	0	2	1	0	3
Guanine nucleotide-binding protein G(I)/G(S)/G(T) subunit beta-1 OS=Rattus norvegicus GN=Gnb1 PE=1 SV=4	GBB1_RAT	37 kDa	0	0	0	0	0	0	0	1	0
Isocitrate dehydrogenase [NADP] cytoplasmic OS=Rattus norvegicus GN=Idh1 PE=1 SV=1	IDHC_RAT	47 kDa	1	1	2	0	1	1	0	6	2
Plasma protease C1 inhibitor OS=Rattus norvegicus GN=Serping1 PE=2 SV=1	IC1_RAT	56 kDa	1	3	0	2	2	3	2	3	2
G-protein coupled receptor family C group 5 member C OS=Rattus norvegicus GN=Gprc5c PE=2 SV=2	GPC5C_RAT	48 kDa	3	4	3	4	3	1	2	4	4
Kynurenine/alpha-aminoadipate aminotransferase, mitochondrial OS=Rattus norvegicus GN=Aadat PE=1 SV=1	AADAT_RAT	48 kDa	4	6	3	3	4	2	4	3	2
Meprin A subunit alpha OS=Rattus norvegicus GN=Mep1a PE=1 SV=2	MEP1A_RAT	85 kDa	25	20	27	23	22	23	17	19	25
Klotho OS=Rattus norvegicus GN=Kl PE=1 SV=1	KLOT_RAT	117 kDa	0	0	0	0	0	0	0	0	2
Seminal vesicle secretory protein 5 OS=Rattus norvegicus GN=Svs5 PE=2 SV=1	SVS5_RAT	14 kDa	0	0	0	0	0	3	0	0	0
Fructose-1,6-bisphosphatase 1 OS=Rattus norvegicus GN=Fbp1 PE=1 SV=2	F16P1_RAT	40 kDa	0	3	2	0	2	1	2	4	2
Interleukin-1 receptor accessory protein OS=Rattus norvegicus GN=Il1rap PE=2 SV=1	IL1AP_RAT	66 kDa	2	2	1	3	2	1	1	2	1
Neuropilin-1 OS=Rattus norvegicus GN=Nrp1 PE=1 SV=1	NRP1_RAT	103 kDa	0	1	1	1	2	0	0	1	1
Keratin, type II cytoskeletal 2 epidermal OS=Rattus norvegicus GN=Krt2 PE=3 SV=1	K22E_RAT	69 kDa	0	0	0	0	1	2	0	0	1
Junctional adhesion molecule C OS=Rattus norvegicus GN=Jam3 PE=1 SV=1	JAM3_RAT	35 kDa	3	2	2	2	3	2	2	2	2
Galectin-3-binding protein OS=Rattus norvegicus GN=Lgals3bp PE=1 SV=2	LG3BP_RAT	64 kDa	6	10	6	6	6	6	7	6	8
Neprilysin OS=Rattus norvegicus GN=Mme PE=1 SV=2	NEP_RAT	86 kDa	11	14	14	9	13	13	14	15	12
Nidogen-2 OS=Rattus norvegicus GN=Nid2 PE=2 SV=1	NID2_RAT	153 kDa	4	5	3	4	5	5	5	3	5
Fibronectin OS=Rattus norvegicus GN=Fn1 PE=1 SV=2	FINC_RAT	273 kDa	34	30	38	37	37	31	31	31	34
Cathepsin S OS=Rattus norvegicus GN=Ctss PE=2 SV=1	CATS_RAT	37 kDa	1	0	0	1	0	0	2	1	0
D-dopachrome decarboxylase OS=Rattus norvegicus GN=Ddt PE=1 SV=3	DOPD_RAT	13 kDa	1	1	1	0	0	2	2	3	1
Amyloid beta A4 protein OS=Rattus norvegicus GN=App PE=1 SV=2	A4_RAT	87 kDa	2	4	3	2	4	2	3	3	3
Aquaporin-1 OS=Rattus norvegicus GN=Aqp1 PE=2 SV=4	AQP1_RAT	29 kDa	3	6	4	4	4	4	3	3	4
PRTG_RAT-DECOY	PRTG_RAT-DECOY	?	0	0	1	0	0	1	0	0	0
Endothelial cell-selective adhesion molecule OS=Rattus norvegicus GN=Esam PE=2 SV=1	ESAM_RAT	42 kDa	6	5	6	6	6	4	6	6	7
Glutamyl aminopeptidase OS=Rattus norvegicus GN=Enpep PE=1 SV=2	AMPE_RAT	108 kDa	18	17	14	18	16	17	19	20	16
Seminal vesicle secretory protein 2 OS=Rattus norvegicus GN=Svs2 PE=1 SV=1	SVS2_RAT	46 kDa	0	5	2	0	6	13	7	6	0
Cystatin-B OS=Rattus norvegicus GN=Cstb PE=1 SV=1	CYTB_RAT	11 kDa	0	1	0	0	0	0	0	0	1
Coagulation factor XII OS=Rattus norvegicus GN=F12 PE=2 SV=1	FA12_RAT	66 kDa	3	2	3	5	2	1	2	2	2
Basal cell adhesion molecule OS=Rattus norvegicus GN=Bcam PE=2 SV=1	BCAM_RAT	68 kDa	4	4	3	2	4	5	2	3	3
Serine protease inhibitor A3M (Fragment) OS=Rattus norvegicus GN=Serpina3m PE=2 SV=1	SPA3M_RAT	46 kDa	3	0	3	3	3	4	4	3	2
Fibrinogen-like protein 1 OS=Rattus norvegicus GN=Fgl1 PE=2 SV=1	FGL1_RAT	36 kDa	0	0	0	0	0	0	1	0	0
Brain acid soluble protein 1 OS=Rattus norvegicus GN=Basp1 PE=1 SV=2	BASP1_RAT	22 kDa	4	5	2	4	6	2	4	6	5
6-phosphogluconolactonase OS=Rattus norvegicus GN=Pgls PE=1 SV=1	6PGL_RAT	27 kDa	4	3	4	5	3	6	6	3	4
Ectonucleotide pyrophosphatase/phosphodiesterase family member 5 OS=Rattus norvegicus GN=Enpp5 PE=1 SV=2	ENPP5_RAT	54 kDa	0	0	0	0	0	0	0	1	0
Follistatin-related protein 1 OS=Rattus norvegicus GN=Fstl1 PE=1 SV=1	FSTL1_RAT	35 kDa	0	3	1	2	3	0	3	1	3
Solute carrier family 23 member 1 OS=Rattus norvegicus GN=Slc23a1 PE=2 SV=1	S23A1_RAT	65 kDa	2	4	2	0	4	0	1	3	2
Ester hydrolase C11orf54 homolog OS=Rattus norvegicus PE=1 SV=1	CK054_RAT	35 kDa	2	2	1	2	2	2	2	3	0
Transcobalamin-2 OS=Rattus norvegicus GN=Tcn2 PE=2 SV=1	TCO2_RAT	47 kDa	2	3	1	2	2	4	3	4	0
N-acetylgalactosamine-6-sulfatase OS=Rattus norvegicus GN=Galns PE=1 SV=1	GALNS_RAT	58 kDa	0	0	0	0	0	0	0	1	0
Vitamin D-binding protein OS=Rattus norvegicus GN=Gc PE=1 SV=3	VTDB_RAT	54 kDa	10	11	9	13	11	7	10	12	13
Cartilage oligomeric matrix protein OS=Rattus norvegicus GN=Comp PE=1 SV=1	COMP_RAT	83 kDa	3	4	3	2	2	4	3	3	4
Prostatic steroid-binding protein C1 OS=Rattus norvegicus GN=Psbpc1 PE=1 SV=1	PSC1_RAT	13 kDa	9	8	9	9	7	13	8	8	8
RT1 class I histocompatibility antigen, AA alpha chain OS=Rattus norvegicus PE=1 SV=2	HA12_RAT	42 kDa	7	7	5	5	5	6	5	6	6
Pituitary tumor-transforming gene 1 protein-interacting protein OS=Rattus norvegicus GN=Pttg1ip PE=2 SV=1	PTTG_RAT	20 kDa	0	2	2	1	0	2	1	1	1
Tubulin beta-4B chain OS=Rattus norvegicus GN=Tubb4b PE=1 SV=1	TBB4B_RAT	50 kDa	0	0	0	0	0	0	0	1	0
Urinary protein 1 OS=Rattus norvegicus PE=1 SV=1	UP1_RAT	11 kDa	27	22	23	30	27	27	20	19	33
Serum albumin OS=Rattus norvegicus GN=Alb PE=1 SV=2	ALBU_RAT	69 kDa	93	87	92	90	91	84	100	81	106
Ephrin-A5 OS=Rattus norvegicus GN=Efna5 PE=1 SV=2	EFNA5_RAT	26 kDa	1	1	0	1	1	0	0	2	0
Gamma-glutamyl hydrolase OS=Rattus norvegicus GN=Ggh PE=1 SV=1	GGH_RAT	36 kDa	11	12	10	12	9	10	11	11	10
Seminal vesicle secretory protein 4 OS=Rattus norvegicus GN=Svs4 PE=1 SV=1	SVS4_RAT	12 kDa	0	1	0	0	1	28	14	0	0
Furin OS=Rattus norvegicus GN=Furin PE=1 SV=1	FURIN_RAT	87 kDa	0	0	0	0	0	0	4	0	0
Beta-glucuronidase OS=Rattus norvegicus GN=Gusb PE=2 SV=1	BGLR_RAT	75 kDa	0	3	0	0	0	3	0	0	0
Polymeric immunoglobulin receptor OS=Rattus norvegicus GN=Pigr PE=2 SV=1	PIGR_RAT	85 kDa	25	20	27	26	24	21	23	23	19
Tyrosine-protein kinase receptor TYRO3 OS=Rattus norvegicus GN=Tyro3 PE=2 SV=1	TYRO3_RAT	96 kDa	1	1	1	1	1	0	1	2	0
Beta-microseminoprotein OS=Rattus norvegicus GN=Msmb PE=1 SV=1	MSMB_RAT	13 kDa	3	0	1	0	0	2	0	1	0
Clusterin OS=Rattus norvegicus GN=Clu PE=1 SV=2	CLUS_RAT	51 kDa	10	11	12	18	8	10	15	12	14
Ubiquitin-40S ribosomal protein S27a OS=Rattus norvegicus GN=Rps27a PE=1 SV=2	RS27A_RAT	18 kDa	2	2	1	2	2	3	1	3	2
Nucleobindin-1 OS=Rattus norvegicus GN=Nucb1 PE=1 SV=1	NUCB1_RAT	54 kDa	4	5	6	8	3	4	7	6	6
Complement C4 OS=Rattus norvegicus GN=C4 PE=1 SV=3	CO4_RAT	192 kDa	11	15	12	16	15	12	16	13	12
Interleukin-1 receptor type 2 OS=Rattus norvegicus GN=Il1r2 PE=2 SV=1	IL1R2_RAT	46 kDa	5	5	6	5	4	4	4	5	5
Prostatic steroid-binding protein C2 OS=Rattus norvegicus GN=Psbpc2 PE=1 SV=1	PSC2_RAT	13 kDa	3	5	9	7	4	8	4	3	5
Protein-glutamine gamma-glutamyltransferase 4 OS=Rattus norvegicus GN=Tgm4 PE=1 SV=2	TGM4_RAT	76 kDa	1	4	13	14	0	27	4	17	0
Keratin, type II cytoskeletal 8 OS=Rattus norvegicus GN=Krt8 PE=1 SV=3	K2C8_RAT	54 kDa	2	0	1	0	1	2	2	4	1
Keratin, type II cytoskeletal 7 OS=Rattus norvegicus GN=Krt7 PE=3 SV=1	K2C7_RAT	51 kDa	0	0	0	0	0	0	0	1	0
Keratin, type II cytoskeletal 6A OS=Rattus norvegicus GN=Krt6a PE=1 SV=1	K2C6A_RAT	59 kDa	1	0	1	0	0	1	0	3	0
Keratin, type II cytoskeletal 1 OS=Rattus norvegicus GN=Krt1 PE=2 SV=1	K2C1_RAT	65 kDa	3	0	3	0	3	3	3	0	3
Keratin, type II cytoskeletal 5 OS=Rattus norvegicus GN=Krt5 PE=1 SV=1	K2C5_RAT	62 kDa	1	1	1	1	0	2	1	2	0
Ectonucleotide pyrophosphatase/phosphodiesterase family member 3 OS=Rattus norvegicus GN=Enpp3 PE=1 SV=2	ENPP3_RAT	99 kDa	0	0	1	0	1	0	2	1	0
Monocyte differentiation antigen CD14 OS=Rattus norvegicus GN=Cd14 PE=2 SV=2	CD14_RAT	40 kDa	5	5	5	6	5	5	5	5	6
Insulin-like growth factor-binding protein 5 OS=Rattus norvegicus GN=Igfbp5 PE=1 SV=1	IBP5_RAT	30 kDa	0	0	0	0	0	1	0	0	0
Cystatin-related protein 2 OS=Rattus norvegicus GN=Crp2 PE=2 SV=1	22P2_RAT	21 kDa	11	8	16	12	6	16	9	10	8
Coxsackievirus and adenovirus receptor homolog OS=Rattus norvegicus GN=Cxadr PE=2 SV=2	CXAR_RAT	40 kDa	2	1	1	1	1	3	1	2	1
Inhibin beta C chain OS=Rattus norvegicus GN=Inhbc PE=2 SV=1	INHBC_RAT	39 kDa	1	1	0	0	0	0	1	0	0
78 kDa glucose-regulated protein OS=Rattus norvegicus GN=Hspa5 PE=1 SV=1	GRP78_RAT	72 kDa	0	2	0	2	0	0	4	0	3
Heat shock cognate 71 kDa protein OS=Rattus norvegicus GN=Hspa8 PE=1 SV=1	HSP7C_RAT	71 kDa	10	8	6	8	9	6	8	8	8
Heat shock-related 70 kDa protein 2 OS=Rattus norvegicus GN=Hspa2 PE=1 SV=2	HSP72_RAT	70 kDa	6	4	4	0	5	4	5	5	4
Serine protease inhibitor Kazal-type 3 OS=Rattus norvegicus GN=Spink3 PE=1 SV=2	ISK3_RAT	9 kDa	0	1	0	0	0	5	1	0	0
Sulfhydryl oxidase 1 OS=Rattus norvegicus GN=Qsox1 PE=1 SV=1	QSOX1_RAT	82 kDa	4	6	5	5	4	12	6	4	5
Aminopeptidase N OS=Rattus norvegicus GN=Anpep PE=1 SV=2	AMPN_RAT	109 kDa	23	25	16	20	20	17	21	19	16
Glandular kallikrein-7, submandibular/renal OS=Rattus norvegicus GN=Klk7 PE=1 SV=1	KLK7_RAT	29 kDa	14	15	16	20	14	16	17	14	13
Urinary protein 2 OS=Rattus norvegicus PE=1 SV=1	UP2_RAT	11 kDa	39	33	37	30	36	38	24	28	43
Multidrug and toxin extrusion protein 1 OS=Rattus norvegicus GN=Slc47a1 PE=1 SV=1	S47A1_RAT	61 kDa	2	1	1	0	1	2	2	2	1
Vacuolar protein sorting-associated protein 4A OS=Rattus norvegicus GN=Vps4a PE=2 SV=1	VPS4A_RAT	49 kDa	0	0	0	0	0	0	0	2	0
Apolipoprotein M OS=Rattus norvegicus GN=Apom PE=1 SV=2	APOM_RAT	22 kDa	1	3	3	4	2	3	2	3	3
Serine protease inhibitor A3N OS=Rattus norvegicus GN=Serpina3n PE=1 SV=3	SPA3N_RAT	47 kDa	6	8	9	8	9	7	6	9	9
CD302 antigen OS=Rattus norvegicus GN=Cd302 PE=2 SV=1	CD302_RAT	25 kDa	1	2	2	2	3	2	1	2	2
Probasin OS=Rattus norvegicus GN=Pbsn PE=1 SV=1	PBAS_RAT	21 kDa	7	3	5	2	0	9	2	3	3
Carboxypeptidase Q OS=Rattus norvegicus GN=Cpq PE=1 SV=1	CBPQ_RAT	52 kDa	11	15	11	12	11	13	10	13	11
Histidine-rich glycoprotein OS=Rattus norvegicus GN=Hrg PE=2 SV=1	HRG_RAT	59 kDa	1	1	1	1	1	1	1	1	1
SMC3_RAT-DECOY	SMC3_RAT-DECOY	?	0	1	1	1	1	1	0	1	0
WNT1-inducible-signaling pathway protein 1 OS=Rattus norvegicus GN=Wisp1 PE=2 SV=1	WISP1_RAT	41 kDa	1	0	0	0	0	1	0	0	1
Alpha/beta hydrolase domain-containing protein 14B OS=Rattus norvegicus GN=Abhd14b PE=2 SV=1	ABHEB_RAT	23 kDa	4	4	0	3	5	3	4	4	3
EGF-containing fibulin-like extracellular matrix protein 1 OS=Rattus norvegicus GN=Efemp1 PE=1 SV=1	FBLN3_RAT	55 kDa	11	9	8	9	9	8	9	8	10
Quinone oxidoreductase OS=Rattus norvegicus GN=Cryz PE=2 SV=1	QOR_RAT	35 kDa	1	3	0	0	1	2	3	2	0
Protein FAM151A OS=Rattus norvegicus GN=Fam151a PE=2 SV=1	F151A_RAT	67 kDa	1	2	0	2	1	0	1	1	0
Secreted frizzled-related protein 4 OS=Rattus norvegicus GN=Sfrp4 PE=2 SV=2	SFRP4_RAT	40 kDa	2	2	0	1	1	2	1	1	2
Prostaglandin F2 receptor negative regulator OS=Rattus norvegicus GN=Ptgfrn PE=1 SV=1	FPRP_RAT	99 kDa	0	0	0	1	0	0	0	0	0
WAP four-disulfide core domain protein 2 OS=Rattus norvegicus GN=Wfdc2 PE=2 SV=1	WFDC2_RAT	17 kDa	5	8	8	8	8	6	6	6	7
CD9 antigen OS=Rattus norvegicus GN=Cd9 PE=1 SV=2	CD9_RAT	25 kDa	0	0	1	1	0	0	0	0	0
Intercellular adhesion molecule 1 OS=Rattus norvegicus GN=Icam1 PE=2 SV=1	ICAM1_RAT	60 kDa	2	3	0	2	1	2	3	3	1
Legumain OS=Rattus norvegicus GN=Lgmn PE=1 SV=1	LGMN_RAT	49 kDa	3	3	2	3	2	4	2	4	0
Alpha-1-antiproteinase OS=Rattus norvegicus GN=Serpina1 PE=1 SV=2	A1AT_RAT	46 kDa	17	18	19	18	18	21	18	17	21
Uteroglobin OS=Rattus norvegicus GN=Scgb1a1 PE=1 SV=2	UTER_RAT	10 kDa	2	0	2	2	2	1	2	1	2
Histone H4 OS=Rattus norvegicus GN=Hist1h4b PE=1 SV=2	H4_RAT	11 kDa	0	0	0	0	0	2	0	2	0
Lysosome-associated membrane glycoprotein 1 OS=Rattus norvegicus GN=Lamp1 PE=1 SV=1	LAMP1_RAT	44 kDa	2	1	0	1	1	1	1	1	1
Serine protease inhibitor A3L OS=Rattus norvegicus GN=Serpina3l PE=1 SV=3	SPA3L_RAT	46 kDa	60	51	58	55	57	45	59	61	45
Angiotensin-converting enzyme OS=Rattus norvegicus GN=Ace PE=2 SV=1	ACE_RAT	151 kDa	1	0	0	2	0	0	4	0	0
Collagen alpha-1(I) chain OS=Rattus norvegicus GN=Col1a1 PE=1 SV=5	CO1A1_RAT	138 kDa	6	5	5	5	5	7	6	4	5
Dipeptidyl peptidase 4 OS=Rattus norvegicus GN=Dpp4 PE=1 SV=2	DPP4_RAT	88 kDa	23	25	15	21	23	15	21	22	22
Uromodulin OS=Rattus norvegicus GN=Umod PE=2 SV=1	UROM_RAT	71 kDa	51	44	32	53	38	56	64	51	27
Carbonic anhydrase 2 OS=Rattus norvegicus GN=Ca2 PE=1 SV=2	CAH2_RAT	29 kDa	2	2	0	1	2	2	1	2	2
Protein disulfide-isomerase OS=Rattus norvegicus GN=P4hb PE=1 SV=2	PDIA1_RAT	57 kDa	1	2	3	2	1	2	2	2	3
Vomeromodulin (Fragment) OS=Rattus norvegicus PE=2 SV=1	VOME_RAT	11 kDa	1	0	1	2	0	0	2	1	0
Glandular kallikrein-12, submandibular/renal OS=Rattus norvegicus GN=Klk12 PE=2 SV=1	KLK12_RAT	29 kDa	4	4	0	0	4	4	4	3	0
Lactadherin OS=Rattus norvegicus GN=Mfge8 PE=2 SV=1	MFGM_RAT	47 kDa	0	0	0	0	1	0	0	0	0
Secretoglobin family 2A member 2 OS=Rattus norvegicus GN=Scgb2a2 PE=1 SV=1	SG2A2_RAT	11 kDa	6	8	4	7	3	7	5	6	4
Transthyretin OS=Rattus norvegicus GN=Ttr PE=1 SV=1	TTHY_RAT	16 kDa	4	4	5	4	6	4	5	4	5
Syndecan-4 OS=Rattus norvegicus GN=Sdc4 PE=1 SV=1	SDC4_RAT	22 kDa	2	0	1	0	2	1	1	0	1
Vitamin K-dependent protein S OS=Rattus norvegicus GN=Pros1 PE=2 SV=1	PROS_RAT	75 kDa	0	0	0	0	0	0	1	0	0
Glutathione peroxidase 3 OS=Rattus norvegicus GN=Gpx3 PE=2 SV=2	GPX3_RAT	25 kDa	3	4	4	4	4	5	3	4	4
Cystatin-related protein 1 OS=Rattus norvegicus GN=Andpro PE=1 SV=1	22P1_RAT	21 kDa	11	9	16	15	8	16	13	12	11
Prothrombin OS=Rattus norvegicus GN=F2 PE=1 SV=1	THRB_RAT	70 kDa	8	8	9	7	8	9	7	6	10
Kallikrein-1 OS=Rattus norvegicus GN=Ngfg PE=2 SV=2	KLK1_RAT	29 kDa	17	20	23	21	15	20	22	18	18
Peptidyl-glycine alpha-amidating monooxygenase OS=Rattus norvegicus GN=Pam PE=1 SV=1	AMD_RAT	109 kDa	1	0	2	2	1	0	1	1	1
Ribonuclease pancreatic gamma-type OS=Rattus norvegicus PE=3 SV=1	RNS1G_RAT	17 kDa	0	3	0	1	3	0	2	0	1
Solute carrier family 15 member 2 OS=Rattus norvegicus GN=Slc15a2 PE=2 SV=1	S15A2_RAT	81 kDa	2	4	2	0	6	0	4	2	3
Gastricsin OS=Rattus norvegicus GN=Pgc PE=1 SV=1	PEPC_RAT	43 kDa	1	1	0	0	2	1	2	0	0
T-cell immunoglobulin and mucin domain-containing protein 2 OS=Rattus norvegicus GN=Timd2 PE=2 SV=1	TIMD2_RAT	39 kDa	0	1	2	1	1	2	1	1	1
Dihydropteridine reductase OS=Rattus norvegicus GN=Qdpr PE=1 SV=1	DHPR_RAT	26 kDa	0	0	0	0	0	0	0	1	0
Ig gamma-2A chain C region OS=Rattus norvegicus GN=Igg-2a PE=1 SV=1	IGG2A_RAT	35 kDa	3	4	2	3	2	4	3	2	4
Serine protease inhibitor A3K OS=Rattus norvegicus GN=Serpina3k PE=1 SV=3	SPA3K_RAT	47 kDa	51	47	42	47	51	45	43	51	50
Neuroplastin OS=Rattus norvegicus GN=Nptn PE=1 SV=2	NPTN_RAT	44 kDa	7	5	7	6	6	7	6	4	8
Solute carrier organic anion transporter family member 1A1 OS=Rattus norvegicus GN=Slco1a1 PE=1 SV=1	SO1A1_RAT	74 kDa	0	3	1	0	0	1	2	2	0
Pancreatic secretory granule membrane major glycoprotein GP2 OS=Rattus norvegicus GN=Gp2 PE=1 SV=1	GP2_RAT	59 kDa	0	9	12	5	12	9	11	12	4
Nuclear transport factor 2 OS=Rattus norvegicus GN=Nutf2 PE=1 SV=1	NTF2_RAT	14 kDa	1	0	2	1	2	0	1	0	1
Arylsulfatase B OS=Rattus norvegicus GN=Arsb PE=2 SV=2	ARSB_RAT	59 kDa	2	4	4	3	5	3	3	4	3
Prostatic spermine-binding protein OS=Rattus norvegicus GN=Sbp PE=1 SV=1	SPBP_RAT	31 kDa	9	7	12	10	7	12	9	10	10
Phosphatidylethanolamine-binding protein 1 OS=Rattus norvegicus GN=Pebp1 PE=1 SV=3	PEBP1_RAT	21 kDa	2	2	2	3	1	2	2	2	2
Interleukin-4 receptor subunit alpha OS=Rattus norvegicus GN=Il4r PE=2 SV=2	IL4RA_RAT	87 kDa	4	2	2	2	2	3	3	3	3
Zinc-alpha-2-glycoprotein OS=Rattus norvegicus GN=Azgp1 PE=2 SV=1	ZA2G_RAT	34 kDa	0	1	0	2	0	0	0	0	1
Rho GDP-dissociation inhibitor 1 OS=Rattus norvegicus GN=Arhgdia PE=1 SV=1	GDIR1_RAT	23 kDa	1	2	0	0	2	2	1	1	2
